# Supplementary material
Source: publisher site journal article supplement (https://www.dovepress.com/article/432808)
Supplement: Supplementary file 1 [file get_supplementary_file.php]

**Supplementary table 1**. Variables contained in the TAI-10 questionnaire (Test of the Adherence to Inhalers)

| **Variables** | **1 point** | **2 points** | **3 points** | **4 points** | **5 points** |
| --- | --- | --- | --- | --- | --- |
| During the last 7 days, how many times did you forget to take your usual inhalers? | All | More than half | Approximately a half | Less than half | None |
| Do you forget to take inhalers? | Always | Mostly | Sometimes | Rarely | Never |
| When you feel good about your illness, do you stop taking your inhalers? | Always | Mostly | Sometimes | Rarely | Never |
| When you are on vacation or weekend, do you stop taking your inhalers? | Always | Mostly | Sometimes | Rarely | Never |
| When you are nervous or sad, do you stop taking your inhalers? | Always | Mostly | Sometimes | Rarely | Never |
| Do you stop taking your inhalers because of fear of side effects? | Always | Mostly | Sometimes | Rarely | Never |
| Do you stop taking your inhalers because of considering they are useless to treat your condition? | Always | Mostly | Sometimes | Rarely | Never |
| Do you take fewer inhalations than those prescribed by your doctor? | Always | Mostly | Sometimes | Rarely | Never |
| Do you stop taking your inhalers because you believe they interfere with your everyday or working life? | Always | Mostly | Sometimes | Rarely | Never |
| Do you stop taking your inhalers because you have difficulties to pay them? | Always | Mostly | Sometimes | Rarely | Never |

**Supplementary table 2**. Variables contained in the FSI-10 questionnaire (Feeling of Satisfaction with Inhaler).

| **Variables** | **Very high satisfaction (5 points)** | **High satisfaction (4 points)** | **Moderate satisfaction (3 points)** | **Low satisfaction (2 points)** | **Very low satisfaction (1 point)** |
| --- | --- | --- | --- | --- | --- |
| Was it easy for you to learn to operate this inhalation device? |  |  |  |  |  |
| Was it easy for you to prepare this inhalation device for inhalation? |  |  |  |  |  |
| Was this inhalation device easy for you to use? |  |  |  |  |  |
| Has it been easy for you to keep the inhalation device in good working order and hygiene? |  |  |  |  |  |
| Was it easy for you to continue your normal activities using this inhalation device? |  |  |  |  |  |
| Was it comfortable for you to adapt the inhalation device to your lips? |  |  |  |  |  |
| Was the inhalation device comfortable for you in terms of weight and size? |  |  |  |  |  |
| Was the inhalation device comfortable for you to carry (transport) with you? |  |  |  |  |  |
| When you inhale, are you left with the feeling that you have used the inhalation device correctly? |  |  |  |  |  |
| Overall, taking all of the above into account, are you satisfied with the inhalation device? |  |  |  |  |  |
